# Supplementary material
Source: HighWire-hosted journal article supplement (https://bjo.bmj.com/content/104/2/247)
Supplement: inline-supplementary-material-2 [file inline-supplementary-material-2.pdf]

**Supplemental Table. Checklist for quality assessment of case series studies on a surgical intervention**

|    | <b>Criteria</b>                                                                                                 | <b>Yes</b> | <b>No</b> | <b>Unclear</b> |
|----|-----------------------------------------------------------------------------------------------------------------|------------|-----------|----------------|
| 1  | Was the study conducted prospectively?                                                                          |            |           |                |
| 2  | Were the cases collected in more than one center?                                                               |            |           |                |
| 3  | Was the recruitment period clearly stated?                                                                      |            |           |                |
| 4  | Were the characteristics of the patients included in the study described?                                       |            |           |                |
| 5  | Were the eligibility criteria (i.e., inclusion and exclusion criteria) for entry into the study clearly stated? |            |           |                |
| 6  | Did patients enter the study at a similar point in the disease?                                                 |            |           |                |
| 7  | Was the intervention of interest clearly described?                                                             |            |           |                |
| 8  | Was the intervention undertaken by someone experienced in performing the procedure?                             |            |           |                |
| 9  | Were additional interventions (co-interventions) clearly described?                                             |            |           |                |
| 10 | Were relevant outcome measures established a priori?                                                            |            |           |                |
| 11 | Were outcome assessors blinded to the intervention that patients received?                                      |            |           |                |
| 12 | Were all the important outcomes considered?                                                                     |            |           |                |
| 13 | Was follow-up in every case long enough for important events and outcomes to occur?                             |            |           |                |
| 14 | Were the adverse events reported?                                                                               |            |           |                |
